# Supplementary material
Source: publisher figshare collection journal article supplement (https://acs.figshare.com/ndownloader/files/4606504)
Supplement: Supplementary file 1 [file 4606504]

_publ_contact_author               'Philip W. Dyer'
_publ_contact_author_email          p.w.dyer@durham.ac.uk

loop_
_publ_author_name
 'Dyer, Philip W.'
 'Fawcett, John'
 'Hanton, Martin J.'  

 
_journal_name_full                 'Organometallics'
_journal_volume                    '?'
_journal_page_first                '?'
_journal_page_last                 '?'
_journal_year                      '2008'
_database_code_depnum_ccdc_journal  653161 

_publ_section_title
; Rigid N-phosphino guanidine P,N-ligands and their use in nickel-catalysed ethylene oligomerisation
;
#=========================================================
  
data_4a 
  
_audit_creation_method            SHELXL-97 
_chemical_name_systematic 
; 
 Diphenyl 1,5,7-triazabicyclo[4.4.0]dec-5-ene phosphine nickel 
 dibromide 
;
_chemical_name_common             ? 
_chemical_melting_point           '> 240 dec.' 
_chemical_formula_moiety          
 'C19 H22 Br2 N3 Ni P, 0.5(C D2 Cl2)'  
_chemical_formula_sum 
 'C19.50 H22 Br2 Cl D N3 Ni P' 
_chemical_formula_weight          585.37 
  
loop_ 
 _atom_type_symbol 
 _atom_type_description 
 _atom_type_scat_dispersion_real 
 _atom_type_scat_dispersion_imag 
 _atom_type_scat_source 
 'C'  'C'   0.0033   0.0016 
 'International Tables Vol C Tables 4.2.6.8 and 6.1.1.4' 
 'D'  'D'   0.0000   0.0000 
 'International Tables Vol C Tables 4.2.6.8 and 6.1.1.4' 
 'N'  'N'   0.0061   0.0033 
 'International Tables Vol C Tables 4.2.6.8 and 6.1.1.4' 
 'P'  'P'   0.1023   0.0942 
 'International Tables Vol C Tables 4.2.6.8 and 6.1.1.4' 
 'Ni'  'Ni'   0.3393   1.1124 
 'International Tables Vol C Tables 4.2.6.8 and 6.1.1.4' 
 'Br'  'Br'  -0.2901   2.4595 
 'International Tables Vol C Tables 4.2.6.8 and 6.1.1.4' 
 'Cl'  'Cl'   0.1484   0.1585 
 'International Tables Vol C Tables 4.2.6.8 and 6.1.1.4' 
 'H'  'H'   0.0000   0.0000 
 'International Tables Vol C Tables 4.2.6.8 and 6.1.1.4' 
  
_symmetry_cell_setting            Monoclinic 
_symmetry_space_group_name_H-M    C2/c 
  
loop_ 
 _symmetry_equiv_pos_as_xyz 
 'x, y, z' 
 '-x, y, -z+1/2' 
 'x+1/2, y+1/2, z' 
 '-x+1/2, y+1/2, -z+1/2' 
 '-x, -y, -z' 
 'x, -y, z-1/2' 
 '-x+1/2, -y+1/2, -z' 
 'x+1/2, -y+1/2, z-1/2' 
  
_cell_length_a                    24.4597(15) 
_cell_length_b                    13.0822(8) 
_cell_length_c                    17.0457(11) 
_cell_angle_alpha                 90.00 
_cell_angle_beta                  127.2440(10) 
_cell_angle_gamma                 90.00 
_cell_volume                      4342.1(5) 
_cell_formula_units_Z             8 
_cell_measurement_temperature     150(2) 
_cell_measurement_reflns_used     9035 
_cell_measurement_theta_min       2.405 
_cell_measurement_theta_max       28.165 
  
_exptl_crystal_description        block 
_exptl_crystal_colour             'deep red' 
_exptl_crystal_size_max           0.49 
_exptl_crystal_size_mid           0.29 
_exptl_crystal_size_min           0.21 
_exptl_crystal_density_meas       ? 
_exptl_crystal_density_diffrn     1.791 
_exptl_crystal_density_method     'not measured' 
_exptl_crystal_F_000              2328 
_exptl_absorpt_coefficient_mu     4.782 
_exptl_absorpt_correction_type    empirical
_exptl_absorpt_correction_T_min   0.33 
_exptl_absorpt_correction_T_max   0.65 
_exptl_absorpt_process_details 
; 
 11008 reflections corrected using SADABS. R(int) = 0.1122 before correction. 
 R(int) = 0.0272 after correction. 
;
  
_exptl_special_details 
; 
 ? 
; 
  
_diffrn_ambient_temperature       150(2) 
_diffrn_radiation_wavelength      0.71073 
_diffrn_radiation_type            MoK\a 
_diffrn_radiation_source          'fine-focus sealed tube' 
_diffrn_radiation_monochromator   graphite 
_diffrn_measurement_device_type   'CCD area detector' 
_diffrn_measurement_method        'phi and omega scans' 
_diffrn_detector_area_resol_mean  ? 
_diffrn_standards_number          ? 
_diffrn_standards_interval_count  ? 
_diffrn_standards_interval_time   ? 
_diffrn_standards_decay_%         ? 
_diffrn_reflns_number             16335 
_diffrn_reflns_av_R_equivalents   0.0338 
_diffrn_reflns_av_sigmaI/netI     0.0251 
_diffrn_reflns_limit_h_min        -30 
_diffrn_reflns_limit_h_max        30 
_diffrn_reflns_limit_k_min        -16 
_diffrn_reflns_limit_k_max        16 
_diffrn_reflns_limit_l_min        -21 
_diffrn_reflns_limit_l_max        21 
_diffrn_reflns_theta_min          1.88 
_diffrn_reflns_theta_max          25.99 
_reflns_number_total              4264 
_reflns_number_gt                 3691 
_reflns_threshold_expression      >2sigma(I) 
  
_computing_data_collection        'Bruker SMART' 
_computing_cell_refinement        'Bruker SMART' 
_computing_data_reduction         'Bruker SAINT' 
_computing_structure_solution     'SHELXS-97 (Sheldrick, 1990)' 
_computing_structure_refinement   'SHELXL-97 (Sheldrick, 1997)' 
_computing_molecular_graphics     'Bruker SHELXTL' 
_computing_publication_material   'Bruker SHELXTL' 
  
_refine_special_details 
; 
 Refinement of F^2^ against ALL reflections.  The weighted R-factor wR and 
 goodness of fit S are based on F^2^, conventional R-factors R are based 
 on F, with F set to zero for negative F^2^. The threshold expression of 
 F^2^ > 2sigma(F^2^) is used only for calculating R-factors(gt) etc. and is 
 not relevant to the choice of reflections for refinement.  R-factors based 
 on F^2^ are statistically about twice as large as those based on F, and R- 
 factors based on ALL data will be even larger. 
; 
  
_refine_ls_structure_factor_coef  Fsqd 
_refine_ls_matrix_type            full 
_refine_ls_weighting_scheme       calc 
_refine_ls_weighting_details 
 'calc w=1/[\s^2^(Fo^2^)+(0.0710P)^2^+0.4016P] where P=(Fo^2^+2Fc^2^)/3' 
_atom_sites_solution_primary      direct 
_atom_sites_solution_secondary    difmap 
_atom_sites_solution_hydrogens    geom 
_refine_ls_hydrogen_treatment     mixed 
_refine_ls_extinction_method      none 
_refine_ls_extinction_coef        ? 
_refine_ls_number_reflns          4264 
_refine_ls_number_parameters      258 
_refine_ls_number_restraints      0 
_refine_ls_R_factor_all           0.0396 
_refine_ls_R_factor_gt            0.0346 
_refine_ls_wR_factor_ref          0.1002 
_refine_ls_wR_factor_gt           0.0986 
_refine_ls_goodness_of_fit_ref    1.067 
_refine_ls_restrained_S_all       1.067 
_refine_ls_shift/su_max           0.001 
_refine_ls_shift/su_mean          0.000 
  
loop_ 
 _atom_site_label 
 _atom_site_type_symbol 
 _atom_site_fract_x 
 _atom_site_fract_y 
 _atom_site_fract_z 
 _atom_site_U_iso_or_equiv 
 _atom_site_adp_type 
 _atom_site_occupancy 
 _atom_site_symmetry_multiplicity 
 _atom_site_calc_flag 
 _atom_site_refinement_flags 
 _atom_site_disorder_assembly 
 _atom_site_disorder_group 
Ni1 Ni 0.107082(18) 0.42242(3) 0.02678(3) 0.01922(12) Uani 1 1 d . . . 
Br1 Br 0.221860(15) 0.43023(2) 0.16430(2) 0.02729(12) Uani 1 1 d . . . 
Br2 Br 0.106309(17) 0.59523(3) -0.01115(3) 0.03722(13) Uani 1 1 d . . . 
P1 P 0.11191(4) 0.27081(6) 0.07204(5) 0.02004(18) Uani 1 1 d . . . 
N1 N 0.01408(12) 0.3910(2) -0.08062(18) 0.0241(6) Uani 1 1 d . . . 
N2 N -0.08037(13) 0.2788(2) -0.1486(2) 0.0314(6) Uani 1 1 d . . . 
N3 N 0.02833(12) 0.23480(18) -0.00720(19) 0.0245(6) Uani 1 1 d . . . 
C1 C -0.01440(14) 0.3046(2) -0.0817(2) 0.0238(6) Uani 1 1 d . . . 
C2 C -0.03219(16) 0.4664(3) -0.1584(2) 0.0323(7) Uani 1 1 d . . . 
H2A H -0.0058 0.5092 -0.1709 0.039 Uiso 1 1 calc R . . 
H2B H -0.0522 0.5100 -0.1358 0.039 Uiso 1 1 calc R . . 
C3 C -0.08894(18) 0.4140(3) -0.2530(3) 0.0408(9) Uani 1 1 d . . . 
H3A H -0.1195 0.4647 -0.3020 0.049 Uiso 1 1 calc R . . 
H3B H -0.0695 0.3740 -0.2786 0.049 Uiso 1 1 calc R . . 
C4 C -0.12798(16) 0.3459(3) -0.2327(2) 0.0384(9) Uani 1 1 d . . . 
H4A H -0.1539 0.3870 -0.2182 0.046 Uiso 1 1 calc R . . 
H4B H -0.1602 0.3048 -0.2905 0.046 Uiso 1 1 calc R . . 
C5 C -0.11294(17) 0.1898(3) -0.1390(3) 0.0462(10) Uani 1 1 d . . . 
H5A H -0.1232 0.1387 -0.1875 0.055 Uiso 1 1 calc R . . 
H5B H -0.1560 0.2109 -0.1527 0.055 Uiso 1 1 calc R . . 
C6 C -0.06797(17) 0.1434(3) -0.0384(3) 0.0422(9) Uani 1 1 d . . . 
H6A H -0.0856 0.0767 -0.0390 0.051 Uiso 1 1 calc R . . 
H6B H -0.0678 0.1864 0.0081 0.051 Uiso 1 1 calc R . . 
C7 C 0.00400(16) 0.1329(2) -0.0073(3) 0.0314(7) Uani 1 1 d . . . 
H7A H 0.0337 0.1031 0.0580 0.038 Uiso 1 1 calc R . . 
H7B H 0.0042 0.0888 -0.0529 0.038 Uiso 1 1 calc R . . 
C8 C 0.15891(14) 0.1785(2) 0.0545(2) 0.0217(6) Uani 1 1 d . . . 
C9 C 0.18097(16) 0.0837(2) 0.1011(2) 0.0253(7) Uani 1 1 d . . . 
H9 H 0.1734 0.0658 0.1466 0.030 Uiso 1 1 calc R . . 
C10 C 0.21439(16) 0.0150(2) 0.0800(2) 0.0297(7) Uani 1 1 d . . . 
H10 H 0.2298 -0.0476 0.1123 0.036 Uiso 1 1 calc R . . 
C11 C 0.22437(18) 0.0411(3) 0.0108(3) 0.0349(8) Uani 1 1 d . . . 
H11 H 0.2462 -0.0043 -0.0040 0.042 Uiso 1 1 calc R . . 
C12 C 0.2019(2) 0.1344(3) -0.0362(3) 0.0443(9) Uani 1 1 d . . . 
H12 H 0.2082 0.1511 -0.0832 0.053 Uiso 1 1 calc R . . 
C13 C 0.17002(18) 0.2033(3) -0.0144(3) 0.0366(8) Uani 1 1 d . . . 
H13 H 0.1559 0.2665 -0.0458 0.044 Uiso 1 1 calc R . . 
C14 C 0.13139(15) 0.2482(2) 0.1914(2) 0.0245(6) Uani 1 1 d . . . 
C15 C 0.19562(15) 0.2129(2) 0.2720(2) 0.0257(7) Uani 1 1 d . . . 
H15 H 0.2295 0.1983 0.2646 0.031 Uiso 1 1 calc R . . 
C16 C 0.20911(17) 0.1996(3) 0.3631(2) 0.0355(8) Uani 1 1 d . . . 
H16 H 0.2512 0.1737 0.4160 0.043 Uiso 1 1 calc R . . 
C17 C 0.1594(2) 0.2252(3) 0.3746(3) 0.0451(9) Uani 1 1 d . . . 
H17 H 0.1682 0.2169 0.4355 0.054 Uiso 1 1 calc R . . 
C18 C 0.09645(19) 0.2633(3) 0.2954(3) 0.0461(10) Uani 1 1 d . . . 
H18 H 0.0638 0.2822 0.3040 0.055 Uiso 1 1 calc R . . 
C19 C 0.08194(17) 0.2733(3) 0.2043(2) 0.0335(8) Uani 1 1 d . . . 
H19 H 0.0391 0.2968 0.1512 0.040 Uiso 1 1 calc R . . 
Cl1 Cl 0.0000 0.15857(18) 0.7500 0.1422(13) Uani 1 2 d S . . 
Cl2 Cl -0.02606(19) -0.0417(3) 0.7698(3) 0.0994(10) Uani 0.50 1 d P . . 
C20 C 0.0415(5) 0.0328(8) 0.7986(8) 0.061(2) Uani 0.50 1 d P . . 
D20A D 0.0764(5) 0.0370(8) 0.8686(8) 0.073 Uiso 0.50 1 d PR . . 
D20B D 0.0620(5) 0.0100(8) 0.7682(8) 0.073 Uiso 0.50 1 d PR . . 
  
loop_ 
 _atom_site_aniso_label 
 _atom_site_aniso_U_11 
 _atom_site_aniso_U_22 
 _atom_site_aniso_U_33 
 _atom_site_aniso_U_23 
 _atom_site_aniso_U_13 
 _atom_site_aniso_U_12 
Ni1 0.0184(2) 0.0177(2) 0.0166(2) -0.00006(14) 0.00805(17) -0.00050(13) 
Br1 0.02039(18) 0.0287(2) 0.02179(18) -0.00321(12) 0.00699(15) -0.00313(11) 
Br2 0.0336(2) 0.0251(2) 0.0427(2) 0.00824(14) 0.01777(18) -0.00194(13) 
P1 0.0182(4) 0.0182(4) 0.0182(4) 0.0000(3) 0.0081(3) 0.0006(3) 
N1 0.0203(12) 0.0243(14) 0.0183(13) 0.0023(10) 0.0067(11) 0.0017(10) 
N2 0.0212(13) 0.0267(14) 0.0290(15) -0.0041(11) 0.0061(12) -0.0027(11) 
N3 0.0184(12) 0.0194(13) 0.0257(14) 0.0001(10) 0.0082(11) -0.0015(10) 
C1 0.0201(14) 0.0242(16) 0.0210(15) -0.0043(12) 0.0093(13) 0.0009(12) 
C2 0.0290(17) 0.0278(17) 0.0226(16) 0.0063(13) 0.0064(14) 0.0028(14) 
C3 0.0303(18) 0.048(2) 0.0171(17) 0.0064(15) 0.0005(15) 0.0067(15) 
C4 0.0218(16) 0.041(2) 0.0265(18) -0.0055(15) 0.0008(14) 0.0041(14) 
C5 0.0218(17) 0.032(2) 0.063(3) -0.0029(18) 0.0144(18) -0.0067(14) 
C6 0.0324(18) 0.0243(18) 0.066(3) 0.0029(17) 0.0276(19) -0.0052(14) 
C7 0.0269(16) 0.0178(16) 0.041(2) 0.0009(14) 0.0165(15) -0.0008(12) 
C8 0.0209(14) 0.0219(15) 0.0179(14) -0.0043(12) 0.0095(12) -0.0013(12) 
C9 0.0254(15) 0.0244(16) 0.0239(16) -0.0008(12) 0.0137(13) -0.0005(12) 
C10 0.0271(16) 0.0213(16) 0.0307(17) -0.0020(13) 0.0122(14) 0.0027(12) 
C11 0.0408(19) 0.0320(19) 0.0374(19) -0.0075(15) 0.0265(17) 0.0030(15) 
C12 0.067(3) 0.043(2) 0.040(2) 0.0040(17) 0.041(2) 0.0115(19) 
C13 0.049(2) 0.0337(19) 0.0326(19) 0.0097(15) 0.0273(17) 0.0104(16) 
C14 0.0263(15) 0.0203(15) 0.0233(16) 0.0006(12) 0.0130(13) 0.0001(12) 
C15 0.0235(15) 0.0251(16) 0.0239(16) 0.0013(12) 0.0120(14) 0.0017(12) 
C16 0.0324(18) 0.041(2) 0.0202(17) 0.0041(14) 0.0092(15) 0.0095(15) 
C17 0.047(2) 0.064(3) 0.0261(19) 0.0067(17) 0.0233(18) 0.0143(19) 
C18 0.040(2) 0.068(3) 0.037(2) 0.0044(19) 0.0268(18) 0.0171(19) 
C19 0.0301(17) 0.039(2) 0.0254(17) 0.0054(14) 0.0136(15) 0.0124(14) 
Cl1 0.217(3) 0.0618(14) 0.0657(14) 0.000 0.0427(17) 0.000 
Cl2 0.122(3) 0.0735(18) 0.090(2) -0.0135(16) 0.058(2) -0.0491(18) 
C20 0.060(5) 0.060(6) 0.064(6) -0.009(5) 0.039(5) -0.008(5) 
  
_geom_special_details 
; 
 All esds (except the esd in the dihedral angle between two l.s. planes) 
 are estimated using the full covariance matrix.  The cell esds are taken 
 into account individually in the estimation of esds in distances, angles 
 and torsion angles; correlations between esds in cell parameters are only 
 used when they are defined by crystal symmetry.  An approximate (isotropic) 
 treatment of cell esds is used for estimating esds involving l.s. planes. 
; 
  
loop_ 
 _geom_bond_atom_site_label_1 
 _geom_bond_atom_site_label_2 
 _geom_bond_distance 
 _geom_bond_site_symmetry_2 
 _geom_bond_publ_flag 
Ni1 N1 1.912(2) . y 
Ni1 P1 2.1054(8) . y 
Ni1 Br1 2.3283(5) . y 
Ni1 Br2 2.3483(5) . y 
P1 N3 1.698(2) . y 
P1 C14 1.810(3) . ? 
P1 C8 1.812(3) . ? 
N1 C1 1.322(4) . y 
N1 C2 1.482(4) . ? 
N2 C1 1.338(4) . y 
N2 C5 1.475(4) . ? 
N2 C4 1.470(4) . ? 
N3 C1 1.390(4) . y 
N3 C7 1.459(4) . ? 
C2 C3 1.512(5) . ? 
C3 C4 1.491(5) . ? 
C5 C6 1.495(5) . ? 
C6 C7 1.506(4) . ? 
C8 C13 1.394(4) . ? 
C8 C9 1.394(4) . ? 
C9 C10 1.399(4) . ? 
C10 C11 1.384(5) . ? 
C11 C12 1.379(5) . ? 
C12 C13 1.381(5) . ? 
C14 C19 1.394(4) . ? 
C14 C15 1.399(4) . ? 
C15 C16 1.390(4) . ? 
C16 C17 1.384(5) . ? 
C17 C18 1.388(5) . ? 
C18 C19 1.373(5) . ? 
Cl1 C20 1.846(11) 2_556 ? 
Cl1 C20 1.846(11) . ? 
Cl2 D20B 0.980(10) 2_556 ? 
Cl2 C20 1.385(10) 2_556 ? 
Cl2 C20 1.716(9) . ? 
Cl2 Cl2 1.768(7) 2_556 ? 
C20 D20B 0.9600 . ? 
C20 D20A 0.9600 . ? 
C20 Cl2 1.385(10) 2_556 ? 
C20 C20 1.673(19) 2_556 ? 
D20B Cl2 0.980(10) 2_556 ? 
  
loop_ 
 _geom_angle_atom_site_label_1 
 _geom_angle_atom_site_label_2 
 _geom_angle_atom_site_label_3 
 _geom_angle 
 _geom_angle_site_symmetry_1 
 _geom_angle_site_symmetry_3 
 _geom_angle_publ_flag 
N1 Ni1 P1 85.32(8) . . y 
N1 Ni1 Br1 169.89(8) . . y 
P1 Ni1 Br1 84.63(2) . . y 
N1 Ni1 Br2 97.87(8) . . y 
P1 Ni1 Br2 175.66(3) . . y 
Br1 Ni1 Br2 92.225(16) . . y 
N3 P1 C14 102.71(14) . . ? 
N3 P1 C8 105.22(13) . . ? 
C14 P1 C8 108.35(14) . . ? 
N3 P1 Ni1 101.32(9) . . ? 
C14 P1 Ni1 118.94(10) . . ? 
C8 P1 Ni1 117.86(10) . . ? 
C1 N1 C2 116.5(3) . . ? 
C1 N1 Ni1 120.6(2) . . ? 
C2 N1 Ni1 122.4(2) . . ? 
C1 N2 C5 123.9(3) . . ? 
C1 N2 C4 121.0(3) . . ? 
C5 N2 C4 114.7(3) . . ? 
C1 N3 C7 121.2(2) . . ? 
C1 N3 P1 115.0(2) . . ? 
C7 N3 P1 123.2(2) . . ? 
N1 C1 N2 125.5(3) . . y 
N1 C1 N3 116.8(3) . . y 
N2 C1 N3 117.7(3) . . y 
N1 C2 C3 111.3(3) . . ? 
C4 C3 C2 109.1(3) . . ? 
N2 C4 C3 110.0(3) . . ? 
N2 C5 C6 112.1(3) . . ? 
C5 C6 C7 109.4(3) . . ? 
N3 C7 C6 107.8(3) . . ? 
C13 C8 C9 118.8(3) . . ? 
C13 C8 P1 116.8(2) . . ? 
C9 C8 P1 124.3(2) . . ? 
C8 C9 C10 120.7(3) . . ? 
C11 C10 C9 119.5(3) . . ? 
C12 C11 C10 119.9(3) . . ? 
C13 C12 C11 120.9(3) . . ? 
C12 C13 C8 120.3(3) . . ? 
C19 C14 C15 119.2(3) . . ? 
C19 C14 P1 118.4(2) . . ? 
C15 C14 P1 122.2(2) . . ? 
C16 C15 C14 120.3(3) . . ? 
C17 C16 C15 119.5(3) . . ? 
C16 C17 C18 120.1(3) . . ? 
C19 C18 C17 120.7(3) . . ? 
C18 C19 C14 120.1(3) . . ? 
C20 Cl1 C20 53.9(6) 2_556 . ? 
D20B Cl2 C20 43.9(4) 2_556 2_556 ? 
D20B Cl2 C20 96.9(9) 2_556 . ? 
C20 Cl2 C20 64.3(7) 2_556 . ? 
D20B Cl2 Cl2 108.2(6) 2_556 2_556 ? 
C20 Cl2 Cl2 64.6(4) 2_556 2_556 ? 
C20 Cl2 Cl2 46.8(4) . 2_556 ? 
D20B C20 D20A 109.2 . . ? 
D20B C20 Cl2 45.0(4) . 2_556 ? 
D20A C20 Cl2 132.1(4) . 2_556 ? 
D20B C20 C20 100.5(6) . 2_556 ? 
D20A C20 C20 149.7(6) . 2_556 ? 
Cl2 C20 C20 67.5(6) 2_556 2_556 ? 
D20B C20 Cl2 113.3(3) . . ? 
D20A C20 Cl2 111.4(4) . . ? 
Cl2 C20 Cl2 68.6(5) 2_556 . ? 
C20 C20 Cl2 48.2(4) 2_556 . ? 
D20B C20 Cl1 111.1(3) . . ? 
D20A C20 Cl1 109.9(3) . . ? 
Cl2 C20 Cl1 117.0(7) 2_556 . ? 
C20 C20 Cl1 63.1(3) 2_556 . ? 
Cl2 C20 Cl1 101.8(5) . . ? 
C20 D20B Cl2 91.1(6) . 2_556 ? 
  
_diffrn_measured_fraction_theta_max    0.999 
_diffrn_reflns_theta_full              25.99 
_diffrn_measured_fraction_theta_full   0.999 
_refine_diff_density_max    1.331 
_refine_diff_density_min   -1.316 
_refine_diff_density_rms    0.111 
  
